# Supplementary material for: Determination of Microplastics in Omega-3 Oil Supplements
Source: MDPI journal article supplement (doi:10.3390/foods13101434), 2024-05-07
Supplement: s1 [file s1]

## Supplementary Materials

# Determination of Microplastics in Omega-3 Oil Supplements

Moonhae Kim <sup>1,2,†</sup>, Juyang Kim <sup>2,†</sup>, Seulah Park <sup>2</sup>, Dowoon Kim <sup>2</sup>, Jaehak Jung <sup>2,\*‡</sup>  
and Dongha Cho <sup>1,\*‡</sup>

<sup>1</sup> Department of Bio-Health Convergence, College of Biomedical Science, Kangwon National University, Chuncheon 24341, Republic of Korea; kmhmsystech@gmail.com (M.K.)

<sup>2</sup> Korea Institute of Analytical Science and Technology, Seoul 04790, Republic of Korea; kjy@kiast.co.kr (J.K.); psa@kiast.co.kr (S.P.); kdw@kiast.co.kr (D.K.)

\* Correspondence: jh3370@naver.com (J.J.); chodh@kangwon.ac.kr (D.C.)

† These authors contributed equally to this work.

‡ These authors also contributed equally to this work.

## Supplementary Results

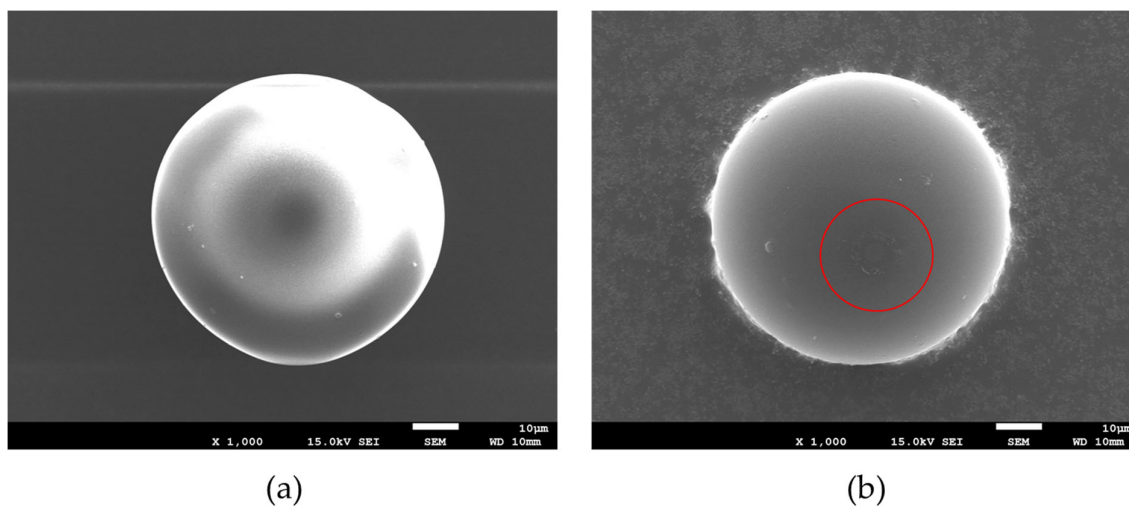

**Figure S1.** PS spheres used for acetone damage test: (a) before treatment; (b) after treatment, red circle shows slightly dissolved surfaced.

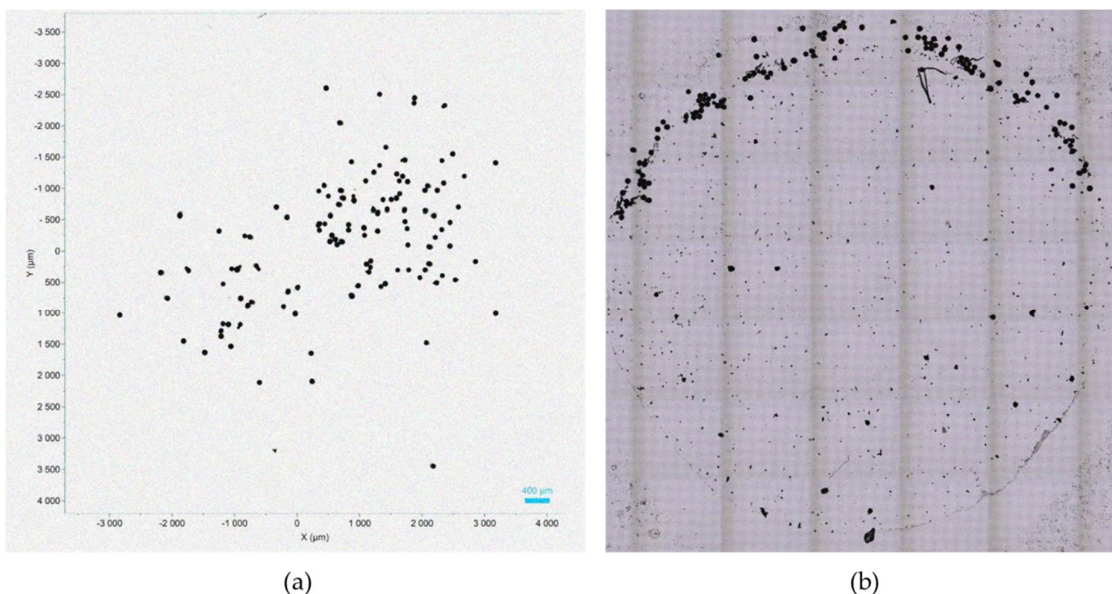

**Figure S2.** PE spheres used for recovery test: (a) before addition; (b) recovered PE spheres on filter.

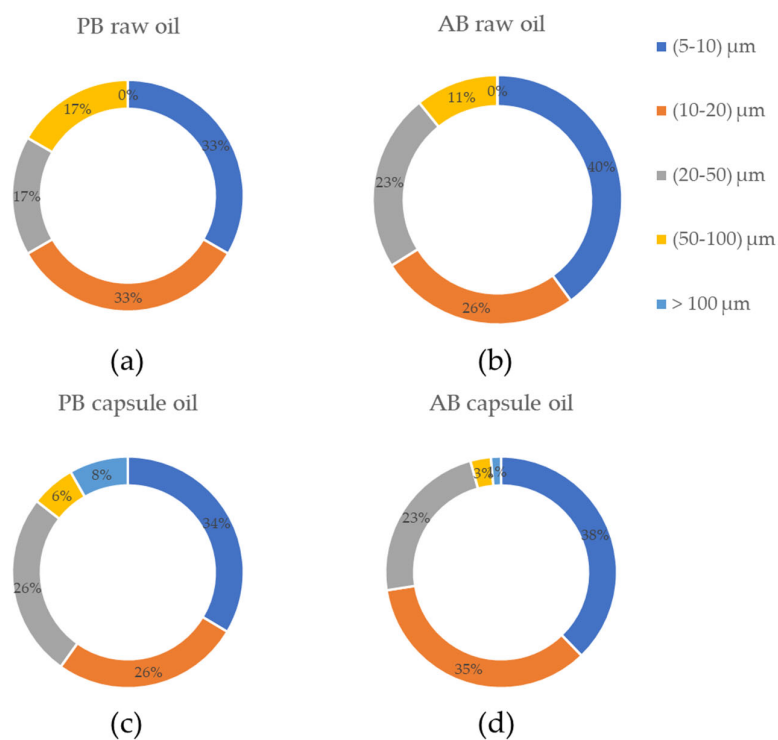

**Figure S3.** Distribution by polymer size of: (a) PB raw oil; (b) PB capsule oil; (c) AB raw oil; (d) AB capsule oil.

**Table S1.** Numbers of MPs in omega-3 samples

| Sample type | Based oil | Total number<br>of MPs | Composition of MPs    | Amount of sample<br>(g) |
|-------------|-----------|------------------------|-----------------------|-------------------------|
| Raw oil     | PB        | 6                      | 3 PP, 1 PS, 2 PET     | 2.5                     |
| Raw oil     | PB        | 0                      | N.D.*                 | 2.5                     |
| Raw oil     | AB        | 7                      | 7 PP                  | 2.5                     |
| Raw oil     | AB        | 6                      | 5 PP, 1 PET           | 2.5                     |
| Raw oil     | AB        | 1                      | 1 PP                  | 2.5                     |
| Raw oil     | AB        | 10                     | 8 PP, 1 PS, 1 PET     | 2.5                     |
| Raw oil     | AB        | 2                      | 2 PP                  | 2.5                     |
| Raw oil     | AB        | 7                      | 7 PP                  | 2.5                     |
| Raw oil     | AB        | 2                      | 2 PP                  | 2.5                     |
| Raw oil     | AB        | 2                      | 1 PE, 1 PET           | 2.5                     |
| Raw oil     | AB        | 3                      | 3 PP                  | 2.5                     |
| Raw oil     | AB        | 14                     | 14 PP                 | 2.5                     |
| Raw oil     | AB        | 8                      | 5 PP, 3 PET           | 2.5                     |
| Raw oil     | AB        | 1                      | 1 PP                  | 2.5                     |
| Capsule oil | PB        | 34                     | 17, PP, 16 PET, 1 PVC | 2.9                     |
| Capsule oil | PB        | 7                      | 7 PP                  | 1.4                     |
| Capsule oil | PB        | 4                      | 3 PP, 1 PVC           | 2.7                     |
| Capsule oil | PB        | 5                      | 1 PE, 4 PET           | 2.2                     |
| Capsule oil | PB        | 0                      | N.D.                  | 3.0                     |
| Capsule oil | PB        | 8                      | 4 PP, 1 PE, 3 PET     | 3.0                     |
| Capsule oil | PB        | 5                      | 1 PP, 4 PET           | 3.0                     |
| Capsule oil | AB        | 0                      | N.D.                  | 3.0                     |
| Capsule oil | AB        | 13                     | 8 PP, 3 PET, 2 PMMA   | 2.1                     |
| Capsule oil | AB        | 9                      | 8 PP, 1 PS            | 2.1                     |
| Capsule oil | AB        | 11                     | 10 PP, 1 PMMA         | 1.1                     |
| Capsule oil | AB        | 8                      | 8 PP                  | 1.1                     |
| Capsule oil | AB        | 17                     | 7 PP, 10 PET          | 2.5                     |
| Capsule oil | AB        | 73                     | 53 PP, 20 PET         | 2.4                     |
| Capsule oil | AB        | 44                     | 6 PP, 34 PET, 4 PVC   | 2.8                     |
| Capsule oil | AB        | 52                     | 21 PP, 31 PET         | 2.7                     |
| Capsule oil | AB        | 18                     | 8 PP, 10 PET          | 0.8                     |
| Capsule oil | AB        | 34                     | 26 PP, 8 PE           | 2.2                     |
| Capsule oil | AB        | 0                      | N.D.                  | 1.1                     |
| Capsule oil | AB        | 8                      | 5 PP, 3 PET           | 1.1                     |
| Capsule oil | AB        | 3                      | 2 PP, 1 PET           | 1.0                     |
| Raw oil     | PB        | 6                      | 3 PP, 1 PS, 2 PET     | 2.5                     |

\*N.D. : Not Detected.
